# Supplementary material
Source: publisher site journal article supplement (https://www.dovepress.com/article/424195)
Supplement: Supplementary file 1 [file get_supplementary_file.php]

Supplementary Table 1. ICD-10 codes used to define included cataract diagnoses.

| **ICD-10 Code** | **Description** |
| --- | --- |
| H25.011 | Cortical age-related cataract, right eye |
| H25.012 | Cortical age-related cataract, left eye |
| H25.013 | Cortical age-related cataract, bilateral |
| H25.11 | Age-related nuclear cataract, right eye |
| H25.12 | Age-related nuclear cataract, left eye |
| H25.13 | Age-related nuclear cataract, bilateral |
| H25.89 | Other age-related cataract |
| H25.21 | Age-related cataract, morgagnian type (hypermature), right eye |
| H25.22 | Age-related cataract, morgagnian type (hypermature), left eye |
| H25.23 | Age-related cataract, morgagnian type (hypermature), bilateral |
| H25.811 | Combined forms of age-related cataract, right eye |
| H25.812 | Combined forms of age-related cataract, left eye |
| H25.813 | Combined forms of age-related cataract, bilateral |

Supplementary Table 2. ICD-10 codes used to define excluded diagnoses.

| **ICD-10 Code** | **Description** |
| --- | --- |
| H21.221 | Degeneration of ciliary body, right eye |
| H21.222 | Degeneration of ciliary body, left eye |
| H21.261 | Iris atrophy (essential) (progressive), right eye |
| H21.262 | Iris atrophy (essential) (progressive), left eye |
| H21.271 | Miotic papillary cyst, right eye |
| H21.272 | Miotic papillary cyst, left eye |
| H21.29 | Other iris atrophy |
| H21.531 | Iridodialysis, right eye |
| H21.532 | Iridodialysis, left eye |
| H21.561 | Pupillary abnormality, right eye |
| H21.562 | Pupillary abnormality, left eye |
| H21.81 | Floppy iris syndrome |
| H21.89 | Other specified disorders of iris and ciliary body |
| H21.9 | Unspecified disorders of iris and ciliary body |
| H22 | Disorders of iris and ciliary body in diseases classified elsewhere |
| H57.00 | Unspecified anomaly of papillary function |
| H57.01 | Argyll Robertson pupil, atypical |
| H57.02 | Anisocoria |
| H57.03 | Miosis |
| H57.04 | Mydriasis |
| H57.051 | Tonic pupil, right eye |
| H57.052 | Tonic pupil, left eye |
| H57.09 | Other anomalies of papillary function |
| H57.9 | Unspecified disorder of eye and adnexa |
| Q13.1 | Absence of iris |
| Q13.9 | Congenital malformation of anterior segment of eye, unspecified |

Supplementary Table 3. CPT codes for cataract related procedures and CPT and HCPCS codes used to identify explants and corrective procedures included in this study.

| **CPT Code** | **Description** |
| --- | --- |
| 66984 | Extracapsular cataract removal with insertion of intraocular lens prosthesis (1 stage procedure), manual or mechanical technique (eg, irrigation and aspiration or phacoemulsification) |
| 65760 | Keratomileusis |
| 65771 | Radial keratotomy |
| 66986 | IOL exchange |
| **HCPCS Code** |  |
| S0800 | Laser in situ keratomileusis |

Supplementary Table 4. CPT codes used to define procedures excluded from this study.

| **CPT Code** | **Description** |
| --- | --- |
| 66982 | Extracapsular cataract removal with insertion of intraocular lens prosthesis (1-stage procedure), manual or mechanical technique (eg, irrigation and aspiration or phacoemulsification), complex, requiring devices or techniques not generally used in routine cataract surgery (eg, iris expansion device, suture support for intraocular lens, or primary posterior capsulorrhexis) or performed on patients in the amblyogenic developmental stage |
| 67030 | Vitreous procedures on the posterior segment of the eye |
| 67113 | Repair of complex retinal detachment (eg, proliferative vitreoretinopathy, stage C-1 or greater, diabetic traction retinal detachment, retinopathy of prematurity, retinal tear of greater than 90 degrees), with vitrectomy and membrane peeling, including, when performed, air, gas, or silicone oil tamponade, cryotherapy, endolaser photocoagulation, drainage of subretinal fluid, scleral buckling, and/or removal of lens |
| 67038 | Historical code for vitrectomy; replaced in 2008 |
| 67107 | Repair of retinal detachment |
| 67108 | Repair of retinal detachment; with vitrectomy, any method, including, when performed, air or gas tamponade, focal endolaser photocoagulation, cryotherapy, drainage of subretinal fluid, scleral buckling, and/or removal of lens by same technique |
| 67110 | Repair of retinal detachment |
